# Supplementary material
Source: PubMed Central journal article supplement (PMC1959483)

Suppl Fig: Deposition of C3b on mTEC (A) and on exposed myoid cells (B) plotted against MG duration at thymectomy, in AChR Ab<sup>+</sup> and in 'SNMG' patients

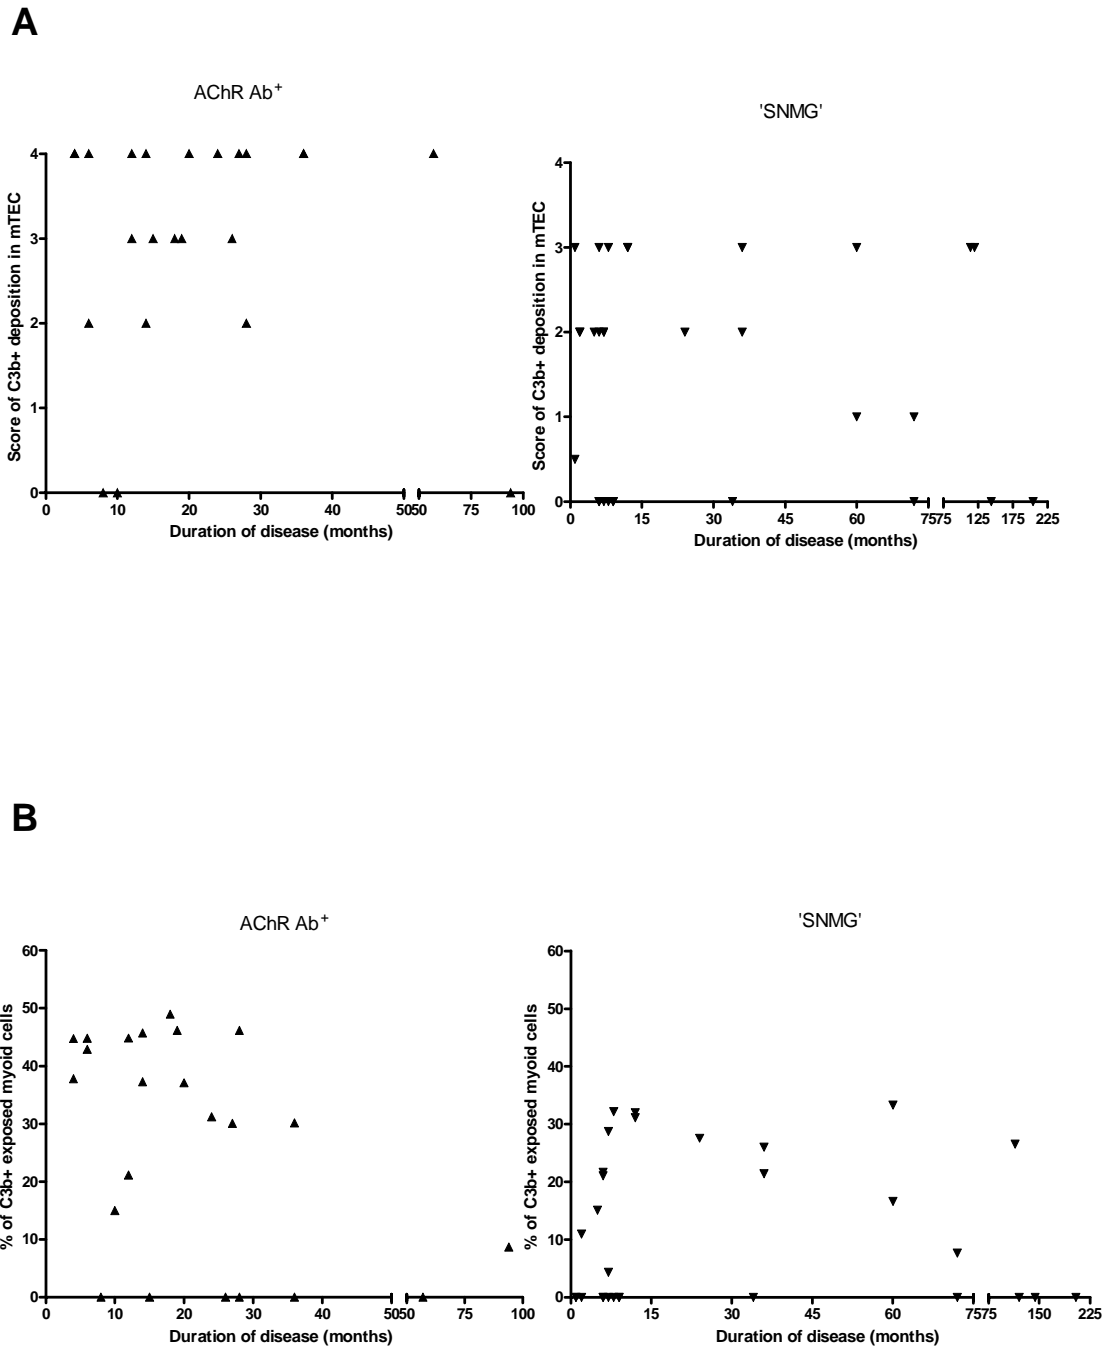

Supplement: amjpathol_ajpath.2007.070240_1.pdf [file amjpathol_ajpath.2007.070240_1.pdf]
