# Supplementary material
Source: PubMed Central journal article supplement (PMC1959483)
Supplement: amjpathol_ajpath.2007.070240_2.pdf [file amjpathol_ajpath.2007.070240_2.pdf]

**Supplementary Table: Demographics of MG patients and controls**

|                                               | Controls<br>(n = 11) | AChRAb <sup>+</sup><br>(EOMG)<br>(n = 23) | AChRAb <sup>lo</sup><br>(n = 8) | 'SNMG'<br>(n = 30) | MuSKAb <sup>+</sup><br>(n = 14) |
|-----------------------------------------------|----------------------|-------------------------------------------|---------------------------------|--------------------|---------------------------------|
| Sex, F : M                                    | 8 : 3                | 21 : 2                                    | 6 : 2                           | 22 : 8             | 10 : 4                          |
| MG onset-age (years)<br>median (range)        |                      | 24.0<br>(12 - 44)                         | 24.0<br>(19 - 46)               | 27.5<br>(10 - 47)  | 20.5<br>(10 - 43)               |
| Age at thymectomy (years)<br>median (range)   | 31.0<br>(17 - 40)    | 25.0<br>(14 - 44)                         | 25.5<br>(21 - 47)               | 32.0<br>(10 - 54)  | 21.5<br>(12 - 44)               |
| Prior MG duration (months)<br>median, (range) |                      | 18.0<br>(4 - 94)                          | 11.0<br>(2 - 42)                | 9.0<br>(1 - 204)   | 12.0<br>(2 - 72)                |
| # taking steroids at thymectomy               | 0                    | 6/23                                      | 3/8                             | 8/30               | 6/14                            |

There was no significant difference between these groups in age at onset or at thymectomy, duration of disease or corticosteroid therapy (P>0.5). These are the same patients as in Ref 25.
